# Supplementary material for: Annual radiocarbon record indicates 16th century BCE date for the Thera eruption
Source: PubMed Central journal article supplement — Sci Adv. 2018 Aug 15;4(8):eaar8241. doi: 10.1126/sciadv.aar8241 (PMC6093623; doi:10.1126/sciadv.aar8241), 2018-08-15
Supplement: aar8241_SM.pdf [file aar8241_SM.pdf]

## Supplementary Materials for

### **Annual radiocarbon record indicates 16th century BCE date for the Thera eruption**

Charlotte L. Pearson\*, Peter W. Brewer, David Brown, Timothy J. Heaton, Gregory W. L. Hodgins, A. J. Timothy Jull, Todd Lange, Matthew W. Salzer

\*Corresponding author. Email: [c.pearson@ltr.arizona.edu](mailto:c.pearson@ltr.arizona.edu)

Published 15 August 2018, *Sci. Adv.* **4**, eaar8241 (2018)  
DOI: [10.1126/sciadv.aar8241](https://doi.org/10.1126/sciadv.aar8241)

#### **This PDF file includes:**

Table S1. Annual determinations of Irish oak and North American bristlecone pine used in this study.

## Supplementary Material

**Table S1.** Annual determinations of Irish oak and North American bristlecone pine used in this study.

| Lab ID   | Site name                       | Taxon                 | Tree code | 14C age (BP) | Calendar age (BP) |
|----------|---------------------------------|-----------------------|-----------|--------------|-------------------|
| AA108000 | Sheep Mountain, California, USA | <i>Pinus longaeva</i> | SHP-851   | 3426 ±24     | 3649              |
| AA108001 | Sheep Mountain, California, USA | <i>Pinus longaeva</i> | SHP-851   | 3420 ±22     | 3648              |
| AA108002 | Sheep Mountain, California, USA | <i>Pinus longaeva</i> | SHP-851   | 3413 ±24     | 3647              |
| AA108003 | Sheep Mountain, California, USA | <i>Pinus longaeva</i> | SHP-851   | 3432 ±22     | 3646              |
| AA108004 | Sheep Mountain, California, USA | <i>Pinus longaeva</i> | SHP-851   | 3399 ±24     | 3645              |
| AA108005 | Sheep Mountain, California, USA | <i>Pinus longaeva</i> | SHP-851   | 3407 ±31     | 3644              |
| AA108006 | Sheep Mountain, California, USA | <i>Pinus longaeva</i> | SHP-851   | 3432 ±22     | 3643              |
| AA108007 | Sheep Mountain, California, USA | <i>Pinus longaeva</i> | SHP-851   | 3429 ±23     | 3642              |
| AA108008 | Sheep Mountain, California, USA | <i>Pinus longaeva</i> | SHP-851   | 3442 ±22     | 3641              |
| AA108009 | Sheep Mountain, California, USA | <i>Pinus longaeva</i> | SHP-851   | 3391 ±25     | 3640              |
| AA108010 | Sheep Mountain, California, USA | <i>Pinus longaeva</i> | SHP-851   | 3430 ±24     | 3639              |
| AA108011 | Sheep Mountain, California, USA | <i>Pinus longaeva</i> | SHP-851   | 3368 ±24     | 3638              |
| AA108012 | Sheep Mountain, California, USA | <i>Pinus longaeva</i> | SHP-851   | 3393 ±24     | 3637              |
| AA108013 | Sheep Mountain, California, USA | <i>Pinus longaeva</i> | SHP-851   | 3356 ±29     | 3636              |
| AA108014 | Sheep Mountain, California, USA | <i>Pinus longaeva</i> | SHP-851   | 3374 ±39     | 3635              |
| AA107964 | Sheep Mountain, California, USA | <i>Pinus longaeva</i> | SHP-851   | 3384 ±16     | 3634              |
| AA107965 | Sheep Mountain, California, USA | <i>Pinus longaeva</i> | SHP-851   | 3401 ±14     | 3633              |
| AA107966 | Sheep Mountain, California, USA | <i>Pinus longaeva</i> | SHP-851   | 3382 ±18     | 3632              |
| AA107967 | Sheep Mountain, California, USA | <i>Pinus longaeva</i> | SHP-851   | 3399 ±15     | 3631              |
| AA107968 | Sheep Mountain, California, USA | <i>Pinus longaeva</i> | SHP-851   | 3378 ±22     | 3630              |
| AA107969 | Sheep Mountain, California, USA | <i>Pinus longaeva</i> | SHP-851   | 3368 ±25     | 3629              |
| AA107970 | Sheep Mountain, California, USA | <i>Pinus longaeva</i> | SHP-851   | 3390 ±22     | 3628              |
| AA107971 | Sheep Mountain, California, USA | <i>Pinus longaeva</i> | SHP-851   | 3351 ±22     | 3627              |
| AA107972 | Sheep Mountain, California, USA | <i>Pinus longaeva</i> | SHP-851   | 3398 ±22     | 3626              |
| AA107973 | Sheep Mountain, California, USA | <i>Pinus longaeva</i> | SHP-851   | 3403 ±22     | 3625              |
| AA107974 | Sheep Mountain, California, USA | <i>Pinus longaeva</i> | SHP-851   | 3385 ±22     | 3624              |
| AA107975 | Sheep Mountain, California, USA | <i>Pinus longaeva</i> | SHP-851   | 3385 ±22     | 3623              |
| AA107976 | Sheep Mountain, California, USA | <i>Pinus longaeva</i> | SHP-851   | 3399 ±26     | 3622              |
| AA107977 | Sheep Mountain, California, USA | <i>Pinus longaeva</i> | SHP-851   | 3403 ±22     | 3621              |
| AA107978 | Sheep Mountain, California, USA | <i>Pinus longaeva</i> | SHP-851   | 3407 ±27     | 3620              |
| AA107979 | Sheep Mountain, California, USA | <i>Pinus longaeva</i> | SHP-33    | 3367 ±15     | 3619              |
| AA107980 | Sheep Mountain, California, USA | <i>Pinus longaeva</i> | SHP-33    | 3389 ±14     | 3618              |

**Table S1 continued**

| Lab ID   | Site name                       | Taxon                 | Tree code | 14C age (BP) | Calendar age (BP) |
|----------|---------------------------------|-----------------------|-----------|--------------|-------------------|
| AA107981 | Sheep Mountain, California, USA | <i>Pinus longaeva</i> | SHP-33    | 3371 ±16     | 3617              |
| AA107982 | Sheep Mountain, California, USA | <i>Pinus longaeva</i> | SHP-33    | 3382 ±15     | 3616              |
| AA107983 | Sheep Mountain, California, USA | <i>Pinus longaeva</i> | SHP-33    | 3391 ±14     | 3615              |
| AA107984 | Sheep Mountain, California, USA | <i>Pinus longaeva</i> | SHP-33    | 3386 ±16     | 3614              |
| AA107985 | Sheep Mountain, California, USA | <i>Pinus longaeva</i> | SHP-33    | 3350 ±14     | 3613              |
| AA107986 | Sheep Mountain, California, USA | <i>Pinus longaeva</i> | SHP-33    | 3382 ±16     | 3612              |
| AA107987 | Sheep Mountain, California, USA | <i>Pinus longaeva</i> | SHP-33    | 3338 ±22     | 3611              |
| AA107988 | Sheep Mountain, California, USA | <i>Pinus longaeva</i> | SHP-33    | 3400 ±21     | 3610              |
| AA107989 | Sheep Mountain, California, USA | <i>Pinus longaeva</i> | SHP-33    | 3381 ±22     | 3609              |
| AA107990 | Sheep Mountain, California, USA | <i>Pinus longaeva</i> | SHP-33    | 3368 ±22     | 3608              |
| AA107991 | Sheep Mountain, California, USA | <i>Pinus longaeva</i> | SHP-33    | 3393 ±22     | 3607              |
| AA107992 | Sheep Mountain, California, USA | <i>Pinus longaeva</i> | SHP-33    | 3414 ±22     | 3606              |
| AA107993 | Sheep Mountain, California, USA | <i>Pinus longaeva</i> | SHP-33    | 3386 ±22     | 3605              |
| AA107994 | Sheep Mountain, California, USA | <i>Pinus longaeva</i> | SHP-33    | 3375 ±22     | 3604              |
| AA107995 | Sheep Mountain, California, USA | <i>Pinus longaeva</i> | SHP-33    | 3375 ±22     | 3603              |
| AA107996 | Sheep Mountain, California, USA | <i>Pinus longaeva</i> | SHP-33    | 3393 ±22     | 3602              |
| AA107997 | Sheep Mountain, California, USA | <i>Pinus longaeva</i> | SHP-33    | 3407 ±22     | 3601              |
| AA107998 | Sheep Mountain, California, USA | <i>Pinus longaeva</i> | SHP-33    | 3405 ±22     | 3600              |
| AA108015 | Sheep Mountain, California, USA | <i>Pinus longaeva</i> | SHP-33    | 3412 ±22     | 3599              |
| AA108016 | Sheep Mountain, California, USA | <i>Pinus longaeva</i> | SHP-33    | 3412 ±22     | 3598              |
| AA108017 | Sheep Mountain, California, USA | <i>Pinus longaeva</i> | SHP-33    | 3431 ±22     | 3597              |
| AA108018 | Sheep Mountain, California, USA | <i>Pinus longaeva</i> | SHP-33    | 3425 ±26     | 3596              |
| AA108019 | Sheep Mountain, California, USA | <i>Pinus longaeva</i> | SHP-33    | 3422 ±24     | 3595              |
| AA108020 | Sheep Mountain, California, USA | <i>Pinus longaeva</i> | SHP-33    | 3374 ±23     | 3594              |
| AA108021 | Sheep Mountain, California, USA | <i>Pinus longaeva</i> | SHP-33    | 3380 ±30     | 3593              |
| AA108022 | Sheep Mountain, California, USA | <i>Pinus longaeva</i> | SHP-33    | 3387 ±26     | 3592              |
| AA108023 | Sheep Mountain, California, USA | <i>Pinus longaeva</i> | SHP-33    | 3367 ±23     | 3591              |
| AA108024 | Sheep Mountain, California, USA | <i>Pinus longaeva</i> | SHP-33    | 3365 ±23     | 3590              |
| AA108045 | Sheep Mountain, California, USA | <i>Pinus longaeva</i> | SHP-33    | 3418 ±25     | 3589              |
| AA108046 | Sheep Mountain, California, USA | <i>Pinus longaeva</i> | SHP-33    | 3403 ±24     | 3588              |
| AA108047 | Sheep Mountain, California, USA | <i>Pinus longaeva</i> | SHP-33    | 3373 ±25     | 3587              |
| AA108048 | Sheep Mountain, California, USA | <i>Pinus longaeva</i> | SHP-33    | 3390 ±24     | 3586              |
| AA108049 | Sheep Mountain, California, USA | <i>Pinus longaeva</i> | SHP-33    | 3400 ±27     | 3585              |
| AA108050 | Sheep Mountain, California, USA | <i>Pinus longaeva</i> | SHP-33    | 3389 ±23     | 3584              |
| AA108051 | Sheep Mountain, California, USA | <i>Pinus longaeva</i> | SHP-33    | 3374 ±23     | 3583              |
| AA108052 | Sheep Mountain, California, USA | <i>Pinus longaeva</i> | SHP-33    | 3369 ±25     | 3582              |
| AA108053 | Sheep Mountain, California, USA | <i>Pinus longaeva</i> | SHP-33    | 3385 ±24     | 3581              |
| AA108054 | Sheep Mountain, California, USA | <i>Pinus longaeva</i> | SHP-33    | 3362 ±25     | 3580              |
| AA108055 | Sheep Mountain, California, USA | <i>Pinus longaeva</i> | SHP-33    | 3380 ±23     | 3579              |
| AA108056 | Sheep Mountain, California, USA | <i>Pinus longaeva</i> | SHP-33    | 3400 ±23     | 3578              |
| AA108057 | Sheep Mountain, California, USA | <i>Pinus longaeva</i> | SHP-33    | 3379 ±24     | 3577              |
| AA108058 | Sheep Mountain, California, USA | <i>Pinus longaeva</i> | SHP-33    | 3391 ±24     | 3576              |
| AA108059 | Sheep Mountain, California, USA | <i>Pinus longaeva</i> | SHP-33    | 3394 ±23     | 3575              |
| AA108060 | Sheep Mountain, California, USA | <i>Pinus longaeva</i> | SHP-33    | 3394 ±24     | 3574              |
| AA108061 | Sheep Mountain, California, USA | <i>Pinus longaeva</i> | SHP-33    | 3394 ±27     | 3573              |
| AA108062 | Sheep Mountain, California, USA | <i>Pinus longaeva</i> | SHP-33    | 3364 ±26     | 3572              |
| AA108063 | Sheep Mountain, California, USA | <i>Pinus longaeva</i> | SHP-33    | 3389 ±24     | 3571              |
| AA108064 | Sheep Mountain, California, USA | <i>Pinus longaeva</i> | SHP-33    | 3381 ±22     | 3570              |
| AA108065 | Sheep Mountain, California, USA | <i>Pinus longaeva</i> | SHP-33    | 3334 ±22     | 3569              |

**Table S1 continued**

| Lab ID   | Site name                       | Taxon                 | Tree code | 14C age (BP) | Calendar age (BP) |
|----------|---------------------------------|-----------------------|-----------|--------------|-------------------|
| AA108066 | Sheep Mountain, California, USA | <i>Pinus longaeva</i> | SHP-33    | 3361 ±22     | 3568              |
| AA108067 | Sheep Mountain, California, USA | <i>Pinus longaeva</i> | SHP-33    | 3344 ±22     | 3567              |
| AA107354 | Sheep Mountain, California, USA | <i>Pinus longaeva</i> | SHP-849   | 3360 ±23     | 3566              |
| AA107355 | Sheep Mountain, California, USA | <i>Pinus longaeva</i> | SHP-849   | 3387 ±21     | 3565              |
| AA107356 | Sheep Mountain, California, USA | <i>Pinus longaeva</i> | SHP-849   | 3333 ±15     | 3564              |
| AA107357 | Sheep Mountain, California, USA | <i>Pinus longaeva</i> | SHP-849   | 3344 ±15     | 3563              |
| AA107358 | Sheep Mountain, California, USA | <i>Pinus longaeva</i> | SHP-849   | 3343 ±13     | 3562              |
| AA107359 | Sheep Mountain, California, USA | <i>Pinus longaeva</i> | SHP-849   | 3323 ±19     | 3561              |
| AA107360 | Sheep Mountain, California, USA | <i>Pinus longaeva</i> | SHP-849   | 3345 ±13     | 3560              |
| AA107361 | Sheep Mountain, California, USA | <i>Pinus longaeva</i> | SHP-849   | 3343 ±13     | 3559              |
| AA107362 | Sheep Mountain, California, USA | <i>Pinus longaeva</i> | SHP-849   | 3335 ±14     | 3558              |
| AA107363 | Sheep Mountain, California, USA | <i>Pinus longaeva</i> | SHP-849   | 3326 ±14     | 3557              |
| AA107364 | Sheep Mountain, California, USA | <i>Pinus longaeva</i> | SHP-849   | 3329 ±13     | 3556              |
| AA107365 | Sheep Mountain, California, USA | <i>Pinus longaeva</i> | SHP-849   | 3306 ±13     | 3555              |
| AA107366 | Sheep Mountain, California, USA | <i>Pinus longaeva</i> | SHP-849   | 3352 ±12     | 3554              |
| AA107367 | Sheep Mountain, California, USA | <i>Pinus longaeva</i> | SHP-849   | 3322 ±13     | 3553              |
| AA107368 | Sheep Mountain, California, USA | <i>Pinus longaeva</i> | SHP-849   | 3303 ±16     | 3552              |
| AA107369 | Sheep Mountain, California, USA | <i>Pinus longaeva</i> | SHP-849   | 3327 ±13     | 3551              |
| AA107370 | Sheep Mountain, California, USA | <i>Pinus longaeva</i> | SHP-849   | 3320 ±12     | 3550              |
| AA107371 | Sheep Mountain, California, USA | <i>Pinus longaeva</i> | SHP-849   | 3304 ±14     | 3549              |
| AA107372 | Sheep Mountain, California, USA | <i>Pinus longaeva</i> | SHP-849   | 3276 ±29     | 3548              |
| AA107373 | Sheep Mountain, California, USA | <i>Pinus longaeva</i> | SHP-849   | 3316 ±18     | 3547              |
| AA107374 | Sheep Mountain, California, USA | <i>Pinus longaeva</i> | SHP-849   | 3304 ±13     | 3546              |
| AA107375 | Sheep Mountain, California, USA | <i>Pinus longaeva</i> | SHP-849   | 3311 ±13     | 3545              |
| AA107376 | Sheep Mountain, California, USA | <i>Pinus longaeva</i> | SHP-849   | 3285 ±25     | 3544              |
| AA107377 | Sheep Mountain, California, USA | <i>Pinus longaeva</i> | SHP-849   | 3307 ±14     | 3543              |
| AA107378 | Sheep Mountain, California, USA | <i>Pinus longaeva</i> | SHP-849   | 3323 ±13     | 3542              |
| AA107379 | Sheep Mountain, California, USA | <i>Pinus longaeva</i> | SHP-849   | 3326 ±13     | 3541              |
| AA107380 | Sheep Mountain, California, USA | <i>Pinus longaeva</i> | SHP-849   | 3332 ±13     | 3540              |
| AA107381 | Sheep Mountain, California, USA | <i>Pinus longaeva</i> | SHP-849   | 3309 ±13     | 3539              |
| AA107382 | Sheep Mountain, California, USA | <i>Pinus longaeva</i> | SHP-849   | 3308 ±18     | 3538              |
| AA107383 | Sheep Mountain, California, USA | <i>Pinus longaeva</i> | SHP-849   | 3303 ±13     | 3537              |
| AA107384 | Sheep Mountain, California, USA | <i>Pinus longaeva</i> | SHP-849   | 3316 ±13     | 3536              |
| AA107385 | Sheep Mountain, California, USA | <i>Pinus longaeva</i> | SHP-849   | 3303 ±14     | 3535              |
| AA107386 | Sheep Mountain, California, USA | <i>Pinus longaeva</i> | SHP-849   | 3333 ±13     | 3534              |
| AA107387 | Sheep Mountain, California, USA | <i>Pinus longaeva</i> | SHP-849   | 3341 ±14     | 3533              |
| AA107388 | Sheep Mountain, California, USA | <i>Pinus longaeva</i> | SHP-849   | 3326 ±13     | 3532              |
| AA107389 | Sheep Mountain, California, USA | <i>Pinus longaeva</i> | SHP-849   | 3330 ±13     | 3531              |
| AA107390 | Sheep Mountain, California, USA | <i>Pinus longaeva</i> | SHP-849   | 3330 ±13     | 3530              |
| AA108025 | Sheep Mountain, California, USA | <i>Pinus longaeva</i> | SHP-849   | 3329 ±23     | 3529              |
| AA108026 | Sheep Mountain, California, USA | <i>Pinus longaeva</i> | SHP-849   | 3335 ±23     | 3528              |
| AA108027 | Sheep Mountain, California, USA | <i>Pinus longaeva</i> | SHP-849   | 3292 ±28     | 3527              |
| AA108028 | Sheep Mountain, California, USA | <i>Pinus longaeva</i> | SHP-849   | 3328 ±44     | 3526              |
| AA108029 | Sheep Mountain, California, USA | <i>Pinus longaeva</i> | SHP-849   | 3321 ±25     | 3525              |
| AA108030 | Sheep Mountain, California, USA | <i>Pinus longaeva</i> | SHP-849   | 3323 ±26     | 3524              |
| AA108031 | Sheep Mountain, California, USA | <i>Pinus longaeva</i> | SHP-849   | 3339 ±25     | 3523              |
| AA108032 | Sheep Mountain, California, USA | <i>Pinus longaeva</i> | SHP-849   | 3352 ±25     | 3522              |
| AA108033 | Sheep Mountain, California, USA | <i>Pinus longaeva</i> | SHP-849   | 3331 ±25     | 3521              |
| AA108034 | Sheep Mountain, California, USA | <i>Pinus longaeva</i> | SHP-849   | 3356 ±27     | 3520              |

**Table S1 continued**

| Lab ID   | Site name                       | Taxon                 | Tree code | 14C age (BP) | Calendar age (BP) |
|----------|---------------------------------|-----------------------|-----------|--------------|-------------------|
| AA108035 | Sheep Mountain, California, USA | <i>Pinus longaeva</i> | SHP-849   | 3320 ±25     | 3519              |
| AA108036 | Sheep Mountain, California, USA | <i>Pinus longaeva</i> | SHP-849   | 3291 ±28     | 3518              |
| AA108037 | Sheep Mountain, California, USA | <i>Pinus longaeva</i> | SHP-849   | 3331 ±22     | 3517              |
| AA108038 | Sheep Mountain, California, USA | <i>Pinus longaeva</i> | SHP-849   | 3310 ±22     | 3516              |
| AA108039 | Sheep Mountain, California, USA | <i>Pinus longaeva</i> | SHP-849   | 3313 ±22     | 3515              |
| AA108040 | Sheep Mountain, California, USA | <i>Pinus longaeva</i> | SHP-849   | 3344 ±29     | 3514              |
| AA108041 | Sheep Mountain, California, USA | <i>Pinus longaeva</i> | SHP-849   | 3322 ±25     | 3513              |
| AA108042 | Sheep Mountain, California, USA | <i>Pinus longaeva</i> | SHP-849   | 3340 ±24     | 3512              |
| AA108043 | Sheep Mountain, California, USA | <i>Pinus longaeva</i> | SHP-849   | 3343 ±24     | 3511              |
| AA108044 | Sheep Mountain, California, USA | <i>Pinus longaeva</i> | SHP-849   | 3325 ±21     | 3510              |
| AA109069 | Sheep Mountain, California, USA | <i>Pinus longaeva</i> | SHP-849   | 3296 ±24     | 3509              |
| AA109068 | Sheep Mountain, California, USA | <i>Pinus longaeva</i> | SHP-849   | 3313 ±28     | 3508              |
| AA109067 | Sheep Mountain, California, USA | <i>Pinus longaeva</i> | SHP-849   | 3304 ±23     | 3507              |
| AA109066 | Sheep Mountain, California, USA | <i>Pinus longaeva</i> | SHP-849   | 3252 ±24     | 3506              |
| AA109065 | Sheep Mountain, California, USA | <i>Pinus longaeva</i> | SHP-849   | 3324 ±23     | 3505              |
| AA109064 | Sheep Mountain, California, USA | <i>Pinus longaeva</i> | SHP-849   | 3313 ±22     | 3504              |
| AA109063 | Sheep Mountain, California, USA | <i>Pinus longaeva</i> | SHP-849   | 3359 ±24     | 3503              |
| AA109062 | Sheep Mountain, California, USA | <i>Pinus longaeva</i> | SHP-849   | 3322 ±20     | 3502              |
| AA109061 | Sheep Mountain, California, USA | <i>Pinus longaeva</i> | SHP-849   | 3311 ±20     | 3501              |
| AA109060 | Sheep Mountain, California, USA | <i>Pinus longaeva</i> | SHP-849   | 3331 ±22     | 3500              |
| AA109020 | Sheep Mountain, California, USA | <i>Pinus longaeva</i> | SHP-849   | 3368 ±21     | 3499              |
| AA109019 | Sheep Mountain, California, USA | <i>Pinus longaeva</i> | SHP-849   | 3329 ±25     | 3498              |
| AA109018 | Sheep Mountain, California, USA | <i>Pinus longaeva</i> | SHP-849   | 3327 ±23     | 3497              |
| AA109017 | Sheep Mountain, California, USA | <i>Pinus longaeva</i> | SHP-849   | 3336 ±21     | 3496              |
| AA109016 | Sheep Mountain, California, USA | <i>Pinus longaeva</i> | SHP-849   | 3352 ±21     | 3495              |
| AA109015 | Sheep Mountain, California, USA | <i>Pinus longaeva</i> | SHP-849   | 3341 ±27     | 3494              |
| AA109014 | Sheep Mountain, California, USA | <i>Pinus longaeva</i> | SHP-849   | 3364 ±21     | 3493              |
| AA109013 | Sheep Mountain, California, USA | <i>Pinus longaeva</i> | SHP-849   | 3319 ±26     | 3492              |
| AA109012 | Sheep Mountain, California, USA | <i>Pinus longaeva</i> | SHP-849   | 3317 ±22     | 3491              |
| AA109011 | Sheep Mountain, California, USA | <i>Pinus longaeva</i> | SHP-849   | 3311 ±21     | 3490              |
| AA109010 | Sheep Mountain, California, USA | <i>Pinus longaeva</i> | SHP-849   | 3314 ±21     | 3489              |
| AA109009 | Sheep Mountain, California, USA | <i>Pinus longaeva</i> | SHP-849   | 3291 ±21     | 3488              |
| AA109008 | Sheep Mountain, California, USA | <i>Pinus longaeva</i> | SHP-849   | 3297 ±22     | 3487              |
| AA108874 | Sheep Mountain, California, USA | <i>Pinus longaeva</i> | SHP-849   | 3273 ±20     | 3486              |
| AA108873 | Sheep Mountain, California, USA | <i>Pinus longaeva</i> | SHP-849   | 3299 ±20     | 3485              |
| AA108872 | Sheep Mountain, California, USA | <i>Pinus longaeva</i> | SHP-849   | 3288 ±20     | 3484              |
| AA108871 | Sheep Mountain, California, USA | <i>Pinus longaeva</i> | SHP-849   | 3319 ±20     | 3483              |
| AA108870 | Sheep Mountain, California, USA | <i>Pinus longaeva</i> | SHP-849   | 3320 ±20     | 3482              |
| AA108869 | Sheep Mountain, California, USA | <i>Pinus longaeva</i> | SHP-849   | 3293 ±20     | 3481              |
| AA108868 | Sheep Mountain, California, USA | <i>Pinus longaeva</i> | SHP-849   | 3272 ±22     | 3480              |
| AA108867 | Sheep Mountain, California, USA | <i>Pinus longaeva</i> | SHP-849   | 3265 ±23     | 3479              |
| AA108866 | Sheep Mountain, California, USA | <i>Pinus longaeva</i> | SHP-849   | 3272 ±22     | 3478              |
| AA108865 | Sheep Mountain, California, USA | <i>Pinus longaeva</i> | SHP-849   | 3247 ±23     | 3477              |
| AA108864 | Sheep Mountain, California, USA | <i>Pinus longaeva</i> | SHP-849   | 3264 ±28     | 3476              |
| AA108108 | Sheep Mountain, California, USA | <i>Pinus longaeva</i> | SHP-849   | 3275 ±22     | 3475              |
| AA108109 | Sheep Mountain, California, USA | <i>Pinus longaeva</i> | SHP-849   | 3325 ±23     | 3474              |
| AA108110 | Sheep Mountain, California, USA | <i>Pinus longaeva</i> | SHP-849   | 3309 ±21     | 3473              |
| AA108111 | Sheep Mountain, California, USA | <i>Pinus longaeva</i> | SHP-849   | 3341 ±21     | 3472              |
| AA108112 | Sheep Mountain, California, USA | <i>Pinus longaeva</i> | SHP-849   | 3316 ±21     | 3471              |

**Table S1 continued**

| Lab ID   | Site name                          | Taxon                 | Tree code | 14C age (BP) | Calendar age (BP) |
|----------|------------------------------------|-----------------------|-----------|--------------|-------------------|
| AA108113 | Sheep Mountain, California, USA    | <i>Pinus longaeva</i> | SHP-849   | 3283 ±21     | 3470              |
| AA108114 | Sheep Mountain, California, USA    | <i>Pinus longaeva</i> | SHP-849   | 3282 ±25     | 3469              |
| AA108115 | Sheep Mountain, California, USA    | <i>Pinus longaeva</i> | SHP-849   | 3271 ±23     | 3468              |
| AA108116 | Sheep Mountain, California, USA    | <i>Pinus longaeva</i> | SHP-849   | 3278 ±21     | 3467              |
| AA108117 | Sheep Mountain, California, USA    | <i>Pinus longaeva</i> | SHP-849   | 3263 ±25     | 3466              |
| AA108118 | Sheep Mountain, California, USA    | <i>Pinus longaeva</i> | SHP-849   | 3269 ±22     | 3465              |
| AA108119 | Sheep Mountain, California, USA    | <i>Pinus longaeva</i> | SHP-849   | 3252 ±23     | 3464              |
| AA108120 | Sheep Mountain, California, USA    | <i>Pinus longaeva</i> | SHP-849   | 3260 ±20     | 3463              |
| AA108121 | Sheep Mountain, California, USA    | <i>Pinus longaeva</i> | SHP-849   | 3251 ±21     | 3462              |
| AA108122 | Sheep Mountain, California, USA    | <i>Pinus longaeva</i> | SHP-849   | 3277 ±24     | 3461              |
| AA108123 | Sheep Mountain, California, USA    | <i>Pinus longaeva</i> | SHP-849   | 3298 ±20     | 3460              |
| AA108068 | Sheep Mountain, California, USA    | <i>Pinus longaeva</i> | SHP-849   | 3269 ±22     | 3459              |
| AA108069 | Sheep Mountain, California, USA    | <i>Pinus longaeva</i> | SHP-849   | 3293 ±22     | 3458              |
| AA108070 | Sheep Mountain, California, USA    | <i>Pinus longaeva</i> | SHP-849   | 3266 ±22     | 3457              |
| AA108072 | Sheep Mountain, California, USA    | <i>Pinus longaeva</i> | SHP-849   | 3236 ±37     | 3455              |
| AA108074 | Sheep Mountain, California, USA    | <i>Pinus longaeva</i> | SHP-849   | 3237 ±23     | 3453              |
| AA108075 | Sheep Mountain, California, USA    | <i>Pinus longaeva</i> | SHP-849   | 3251 ±22     | 3452              |
| AA108076 | Sheep Mountain, California, USA    | <i>Pinus longaeva</i> | SHP-849   | 3231 ±25     | 3451              |
| AA108077 | Sheep Mountain, California, USA    | <i>Pinus longaeva</i> | SHP-849   | 3248 ±22     | 3450              |
| AA109463 | Timahoe West, Co. Kildare, Ireland | <i>Quercus</i> sp.    | Q6427     | 3333 ±21     | 3615              |
| AA109462 | Timahoe West, Co. Kildare, Ireland | <i>Quercus</i> sp.    | Q6427     | 3359 ±21     | 3614              |
| AA109461 | Timahoe West, Co. Kildare, Ireland | <i>Quercus</i> sp.    | Q6427     | 3349 ±21     | 3613              |
| AA109460 | Timahoe West, Co. Kildare, Ireland | <i>Quercus</i> sp.    | Q6427     | 3333 ±22     | 3612              |
| AA109459 | Timahoe West, Co. Kildare, Ireland | <i>Quercus</i> sp.    | Q6427     | 3366 ±21     | 3611              |
| AA108998 | Timahoe West, Co. Kildare, Ireland | <i>Quercus</i> sp.    | Q6427     | 3370 ±21     | 3610              |
| AA108997 | Timahoe West, Co. Kildare, Ireland | <i>Quercus</i> sp.    | Q6427     | 3377 ±26     | 3609              |
| AA108996 | Timahoe West, Co. Kildare, Ireland | <i>Quercus</i> sp.    | Q6427     | 3381 ±21     | 3608              |
| AA108995 | Timahoe West, Co. Kildare, Ireland | <i>Quercus</i> sp.    | Q6427     | 3391 ±21     | 3607              |
| AA108994 | Timahoe West, Co. Kildare, Ireland | <i>Quercus</i> sp.    | Q6427     | 3395 ±21     | 3606              |
| AA108993 | Timahoe West, Co. Kildare, Ireland | <i>Quercus</i> sp.    | Q6427     | 3403 ±21     | 3605              |
| AA108992 | Timahoe West, Co. Kildare, Ireland | <i>Quercus</i> sp.    | Q6427     | 3403 ±21     | 3604              |
| AA108991 | Timahoe West, Co. Kildare, Ireland | <i>Quercus</i> sp.    | Q6427     | 3359 ±24     | 3603              |
| AA108915 | Timahoe West, Co. Kildare, Ireland | <i>Quercus</i> sp.    | Q6427     | 3380 ±20     | 3602              |
| AA108914 | Timahoe West, Co. Kildare, Ireland | <i>Quercus</i> sp.    | Q6427     | 3367 ±23     | 3601              |
| AA108913 | Timahoe West, Co. Kildare, Ireland | <i>Quercus</i> sp.    | Q6427     | 3391 ±23     | 3600              |
| AA108912 | Timahoe West, Co. Kildare, Ireland | <i>Quercus</i> sp.    | Q6427     | 3402 ±22     | 3599              |
| AA108911 | Timahoe West, Co. Kildare, Ireland | <i>Quercus</i> sp.    | Q6427     | 3412 ±23     | 3598              |
| AA108910 | Timahoe West, Co. Kildare, Ireland | <i>Quercus</i> sp.    | Q6427     | 3385 ±23     | 3597              |
| AA108909 | Timahoe West, Co. Kildare, Ireland | <i>Quercus</i> sp.    | Q6427     | 3445 ±19     | 3596              |
| AA108908 | Timahoe West, Co. Kildare, Ireland | <i>Quercus</i> sp.    | Q6427     | 3397 ±19     | 3595              |
| AA108907 | Timahoe West, Co. Kildare, Ireland | <i>Quercus</i> sp.    | Q6427     | 3411 ±21     | 3594              |
| AA108906 | Timahoe West, Co. Kildare, Ireland | <i>Quercus</i> sp.    | Q6427     | 3381 ±20     | 3593              |
| AA108905 | Timahoe West, Co. Kildare, Ireland | <i>Quercus</i> sp.    | Q6427     | 3401 ±23     | 3592              |
| AA108904 | Timahoe West, Co. Kildare, Ireland | <i>Quercus</i> sp.    | Q6427     | 3401 ±19     | 3591              |
| AA108903 | Timahoe West, Co. Kildare, Ireland | <i>Quercus</i> sp.    | Q6427     | 3385 ±21     | 3590              |
| AA108902 | Timahoe West, Co. Kildare, Ireland | <i>Quercus</i> sp.    | Q6427     | 3411 ±19     | 3589              |
| AA108901 | Timahoe West, Co. Kildare, Ireland | <i>Quercus</i> sp.    | Q6427     | 3390 ±20     | 3588              |
| AA108900 | Timahoe West, Co. Kildare, Ireland | <i>Quercus</i> sp.    | Q6427     | 3384 ±19     | 3587              |
| AA108990 | Timahoe West, Co. Kildare, Ireland | <i>Quercus</i> sp.    | Q6427     | 3379 ±20     | 3586              |

**Table S1 continued**

| Lab ID   | Site name                          | Taxon              | Tree code | 14C age (BP) | Calendar age (BP) |
|----------|------------------------------------|--------------------|-----------|--------------|-------------------|
| AA108989 | Timahoe West, Co. Kildare, Ireland | <i>Quercus</i> sp. | Q6427     | 3367 ±19     | 3585              |
| AA108988 | Timahoe West, Co. Kildare, Ireland | <i>Quercus</i> sp. | Q6427     | 3397 ±19     | 3584              |
| AA108987 | Timahoe West, Co. Kildare, Ireland | <i>Quercus</i> sp. | Q6427     | 3394 ±19     | 3583              |
| AA108986 | Timahoe West, Co. Kildare, Ireland | <i>Quercus</i> sp. | Q6427     | 3349 ±19     | 3582              |
| AA108985 | Timahoe West, Co. Kildare, Ireland | <i>Quercus</i> sp. | Q6427     | 3397 ±19     | 3581              |
| AA108984 | Timahoe West, Co. Kildare, Ireland | <i>Quercus</i> sp. | Q6427     | 3417 ±19     | 3580              |
| AA108685 | Timahoe West, Co. Kildare, Ireland | <i>Quercus</i> sp. | Q5653     | 3372 ±23     | 3579              |
| AA108686 | Timahoe West, Co. Kildare, Ireland | <i>Quercus</i> sp. | Q5653     | 3392 ±22     | 3578              |
| AA108687 | Timahoe West, Co. Kildare, Ireland | <i>Quercus</i> sp. | Q5653     | 3378 ±22     | 3577              |
| AA108688 | Timahoe West, Co. Kildare, Ireland | <i>Quercus</i> sp. | Q5653     | 3426 ±24     | 3576              |
| AA108689 | Timahoe West, Co. Kildare, Ireland | <i>Quercus</i> sp. | Q5653     | 3377 ±20     | 3575              |
| AA108690 | Timahoe West, Co. Kildare, Ireland | <i>Quercus</i> sp. | Q5653     | 3371 ±19     | 3574              |
| AA108691 | Timahoe West, Co. Kildare, Ireland | <i>Quercus</i> sp. | Q5653     | 3332 ±20     | 3573              |
| AA108692 | Timahoe West, Co. Kildare, Ireland | <i>Quercus</i> sp. | Q5653     | 3328 ±24     | 3572              |
| AA108693 | Timahoe West, Co. Kildare, Ireland | <i>Quercus</i> sp. | Q5653     | 3359 ±23     | 3571              |
| AA108694 | Timahoe West, Co. Kildare, Ireland | <i>Quercus</i> sp. | Q5653     | 3362 ±22     | 3570              |
| AA108695 | Timahoe West, Co. Kildare, Ireland | <i>Quercus</i> sp. | Q5653     | 3371 ±24     | 3569              |
| AA108696 | Timahoe West, Co. Kildare, Ireland | <i>Quercus</i> sp. | Q5653     | 3331 ±24     | 3568              |
| AA108697 | Timahoe West, Co. Kildare, Ireland | <i>Quercus</i> sp. | Q5653     | 3332 ±37     | 3567              |
| AA108184 | Timahoe West, Co. Kildare, Ireland | <i>Quercus</i> sp. | Q5653     | 3335 ±23     | 3566              |
| AA108344 | Timahoe West, Co. Kildare, Ireland | <i>Quercus</i> sp. | Q5653     | 3325 ±26     | 3565              |
| AA108647 | Timahoe West, Co. Kildare, Ireland | <i>Quercus</i> sp. | Q5653     | 3358 ±20     | 3564              |
| AA108646 | Timahoe West, Co. Kildare, Ireland | <i>Quercus</i> sp. | Q5653     | 3333 ±21     | 3563              |
| AA108645 | Timahoe West, Co. Kildare, Ireland | <i>Quercus</i> sp. | Q5653     | 3320 ±25     | 3562              |
| AA108644 | Timahoe West, Co. Kildare, Ireland | <i>Quercus</i> sp. | Q5653     | 3318 ±21     | 3561              |
| AA108643 | Timahoe West, Co. Kildare, Ireland | <i>Quercus</i> sp. | Q5653     | 3315 ±21     | 3560              |
| AA108642 | Timahoe West, Co. Kildare, Ireland | <i>Quercus</i> sp. | Q5653     | 3325 ±27     | 3559              |
| AA108641 | Timahoe West, Co. Kildare, Ireland | <i>Quercus</i> sp. | Q5653     | 3309 ±21     | 3558              |
| AA108640 | Timahoe West, Co. Kildare, Ireland | <i>Quercus</i> sp. | Q5653     | 3311 ±21     | 3557              |
| AA108639 | Timahoe West, Co. Kildare, Ireland | <i>Quercus</i> sp. | Q5653     | 3306 ±23     | 3556              |
| AA108638 | Timahoe West, Co. Kildare, Ireland | <i>Quercus</i> sp. | Q5653     | 3301 ±21     | 3555              |
| AA108637 | Timahoe West, Co. Kildare, Ireland | <i>Quercus</i> sp. | Q5653     | 3338 ±21     | 3554              |
| AA108345 | Timahoe West, Co. Kildare, Ireland | <i>Quercus</i> sp. | Q5653     | 3305 ±33     | 3553              |
| AA108346 | Timahoe West, Co. Kildare, Ireland | <i>Quercus</i> sp. | Q5653     | 3306 ±32     | 3552              |
| AA108347 | Timahoe West, Co. Kildare, Ireland | <i>Quercus</i> sp. | Q5653     | 3319 ±48     | 3551              |
| AA108348 | Timahoe West, Co. Kildare, Ireland | <i>Quercus</i> sp. | Q5653     | 3328 ±32     | 3550              |
| AA108349 | Timahoe West, Co. Kildare, Ireland | <i>Quercus</i> sp. | Q5653     | 3331 ±35     | 3549              |
| AA108350 | Timahoe West, Co. Kildare, Ireland | <i>Quercus</i> sp. | Q5653     | 3332 ±34     | 3548              |
| AA108351 | Timahoe West, Co. Kildare, Ireland | <i>Quercus</i> sp. | Q5653     | 3304 ±39     | 3547              |
| AA108352 | Timahoe West, Co. Kildare, Ireland | <i>Quercus</i> sp. | Q5653     | 3306 ±26     | 3546              |
| AA108353 | Timahoe West, Co. Kildare, Ireland | <i>Quercus</i> sp. | Q5653     | 3304 ±25     | 3545              |
| AA108354 | Timahoe West, Co. Kildare, Ireland | <i>Quercus</i> sp. | Q5653     | 3298 ±25     | 3544              |
| AA108355 | Timahoe West, Co. Kildare, Ireland | <i>Quercus</i> sp. | Q5653     | 3302 ±25     | 3543              |
| AA108356 | Timahoe West, Co. Kildare, Ireland | <i>Quercus</i> sp. | Q5653     | 3322 ±21     | 3542              |
| AA108357 | Timahoe West, Co. Kildare, Ireland | <i>Quercus</i> sp. | Q5653     | 3303 ±28     | 3541              |
| AA108358 | Timahoe West, Co. Kildare, Ireland | <i>Quercus</i> sp. | Q5653     | 3325 ±25     | 3540              |
| AA108359 | Timahoe West, Co. Kildare, Ireland | <i>Quercus</i> sp. | Q5653     | 3335 ±25     | 3539              |
| AA108636 | Timahoe West, Co. Kildare, Ireland | <i>Quercus</i> sp. | Q5653     | 3310 ±21     | 3538              |
| AA108671 | Timahoe West, Co. Kildare, Ireland | <i>Quercus</i> sp. | Q5653     | 3346 ±23     | 3537              |

**Table S1 continued**

---

| Lab ID   | Site name                          | Taxon              | Tree code | 14C age (BP) | Calendar age (BP) |
|----------|------------------------------------|--------------------|-----------|--------------|-------------------|
| AA108672 | Timahoe West, Co. Kildare, Ireland | <i>Quercus</i> sp. | Q5653     | 3332 ±24     | 3536              |
| AA108673 | Timahoe West, Co. Kildare, Ireland | <i>Quercus</i> sp. | Q5653     | 3320 ±25     | 3535              |
| AA108674 | Timahoe West, Co. Kildare, Ireland | <i>Quercus</i> sp. | Q5653     | 3320 ±23     | 3534              |
| AA108675 | Timahoe West, Co. Kildare, Ireland | <i>Quercus</i> sp. | Q5653     | 3326 ±24     | 3533              |
| AA108676 | Timahoe West, Co. Kildare, Ireland | <i>Quercus</i> sp. | Q5653     | 3304 ±32     | 3532              |
| AA108677 | Timahoe West, Co. Kildare, Ireland | <i>Quercus</i> sp. | Q5653     | 3331 ±25     | 3531              |
| AA108678 | Timahoe West, Co. Kildare, Ireland | <i>Quercus</i> sp. | Q5653     | 3301 ±47     | 3530              |
| AA108806 | Timahoe West, Co. Kildare, Ireland | <i>Quercus</i> sp. | Q5653     | 3334 ±21     | 3529              |

---
